# Supplementary material for: Machine learning predicts liver cancer risk from routine clinical data: a large population-based multicentric study
Source: bioRxiv or medRxiv preprint supplement (doi:10.1101/2024.11.03.24316662), 2024-11-04
Supplement: Supplementary file [file media-1.pdf]

# Machine learning predicts liver cancer risk from routine clinical data: a large population-based multicentric study

Jan Clusmann (1, 2), Paul-Henry Koop (1), David Y. Zhang (3,4), Felix van Haag (1), Omar S. M. El Nahhas (2, 5), Tobias Seibel (1), Laura Žigutyte (2), Apichat Kaewdech (6), Julien Calderaro (7, 8, 9, 10), Frank Tacke (11), Tom Luedde (12), Daniel Truhn (13), Tony Bruns (1), Kai Markus Schneider (1, 2, 14, 15), Jakob N. Kather (2, 14, 16, ‡), Carolin V. Schneider (1, ‡, \*)

1. Department of Medicine III, University Hospital RWTH Aachen, Aachen, Germany
2. Else Kroener Fresenius Center for Digital Health, Technical University Dresden, Dresden, Germany
3. Department of Genetics, Perelman School of Medicine, University of Pennsylvania, Philadelphia, USA
4. Department of Medicine, Perelman School of Medicine, University of Pennsylvania, Philadelphia, USA.
5. StratifAI GmbH, Dresden, Germany
6. Gastroenterology and Hepatology Unit, Division of Internal Medicine, Faculty of Medicine, Prince of Songkla University, Songkhla 90110, Thailand
7. Université Paris Est Créteil, INSERM, IMRB, F-94010, Créteil, France
8. Assistance Publique-Hôpitaux de Paris, Henri Mondor-Albert Chenevier University Hospital, Department of Pathology, Créteil, France
9. Inserm, U955, Team 18, Créteil, France
10. European Reference Network (ERN) RARE-LIVER, Créteil, France
11. Department of Hepatology and Gastroenterology, Charité - Universitätsmedizin Berlin, Campus Virchow-Klinikum and Campus Charité Mitte, Berlin, Germany
12. Department for Gastroenterology, Hepatology and Infectiology, University Hospital Düsseldorf, Germany
13. Department of Diagnostic and Interventional Radiology, University Hospital Aachen, Germany
14. Department of Medicine I, University Hospital Dresden, Dresden, Germany
15. Center for Regenerative Therapies Dresden (CRTD), Technische Universität (TU), Dresden, Germany.
16. Department of Medical Oncology, National Center for Tumor Diseases (NCT), Heidelberg University Hospital, Heidelberg, Germany

## Table of Contents:

|                                                            |          |
|------------------------------------------------------------|----------|
| <b>Supplementary Figures</b>                               | <b>2</b> |
| Supplementary Fig. 1: Data processing flowchart            | 2        |
| Supplementary Fig. 2: Preprocessing of study participants. | 3        |
| Supplementary Fig. 3: Additional performance metrics       | 4        |
| Table of content for supplementary tables                  | 5        |

# Supplementary Figures

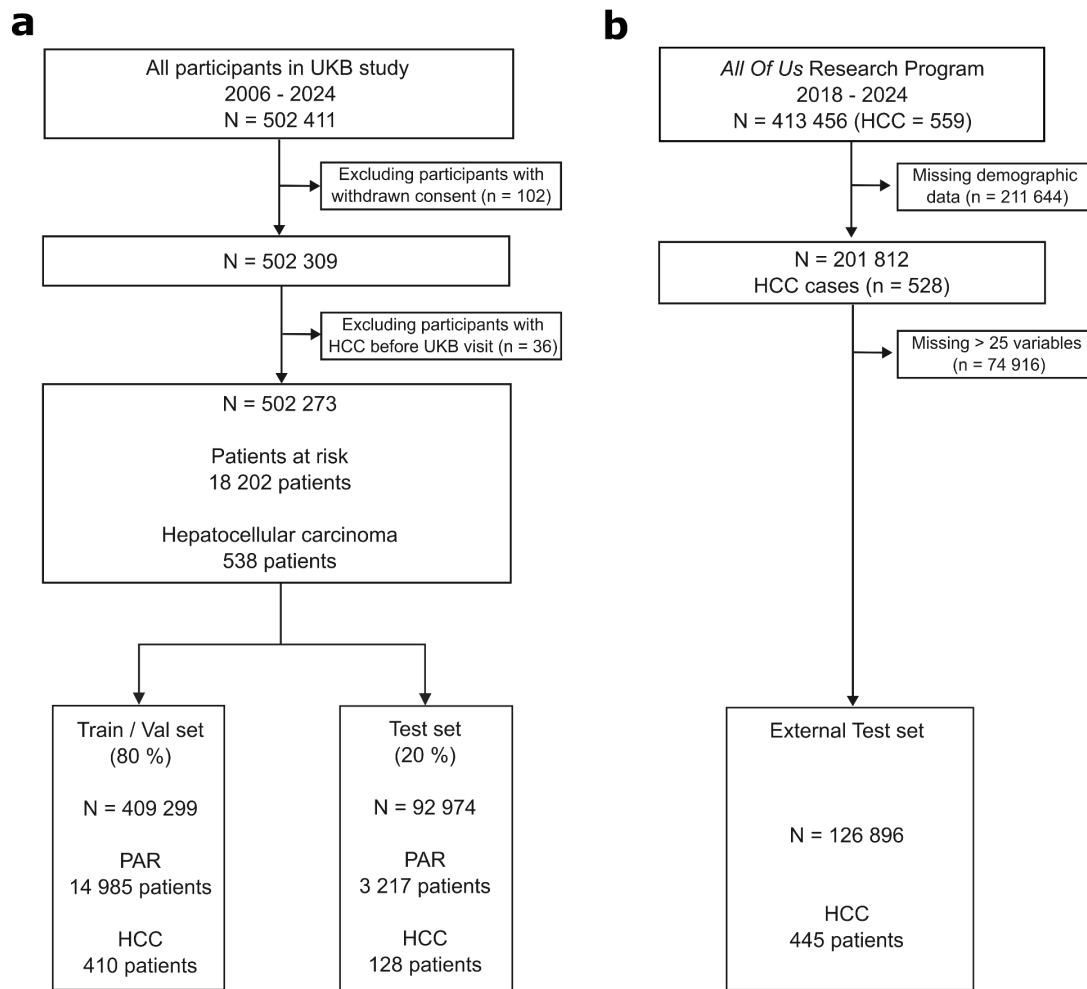

**Supplementary Fig. 1: Data processing flowchart**

**a** Data processing flowchart for UKB participants. Val = Validation. **b** Data processing flowchart for participants in “All Of Us” Research Program



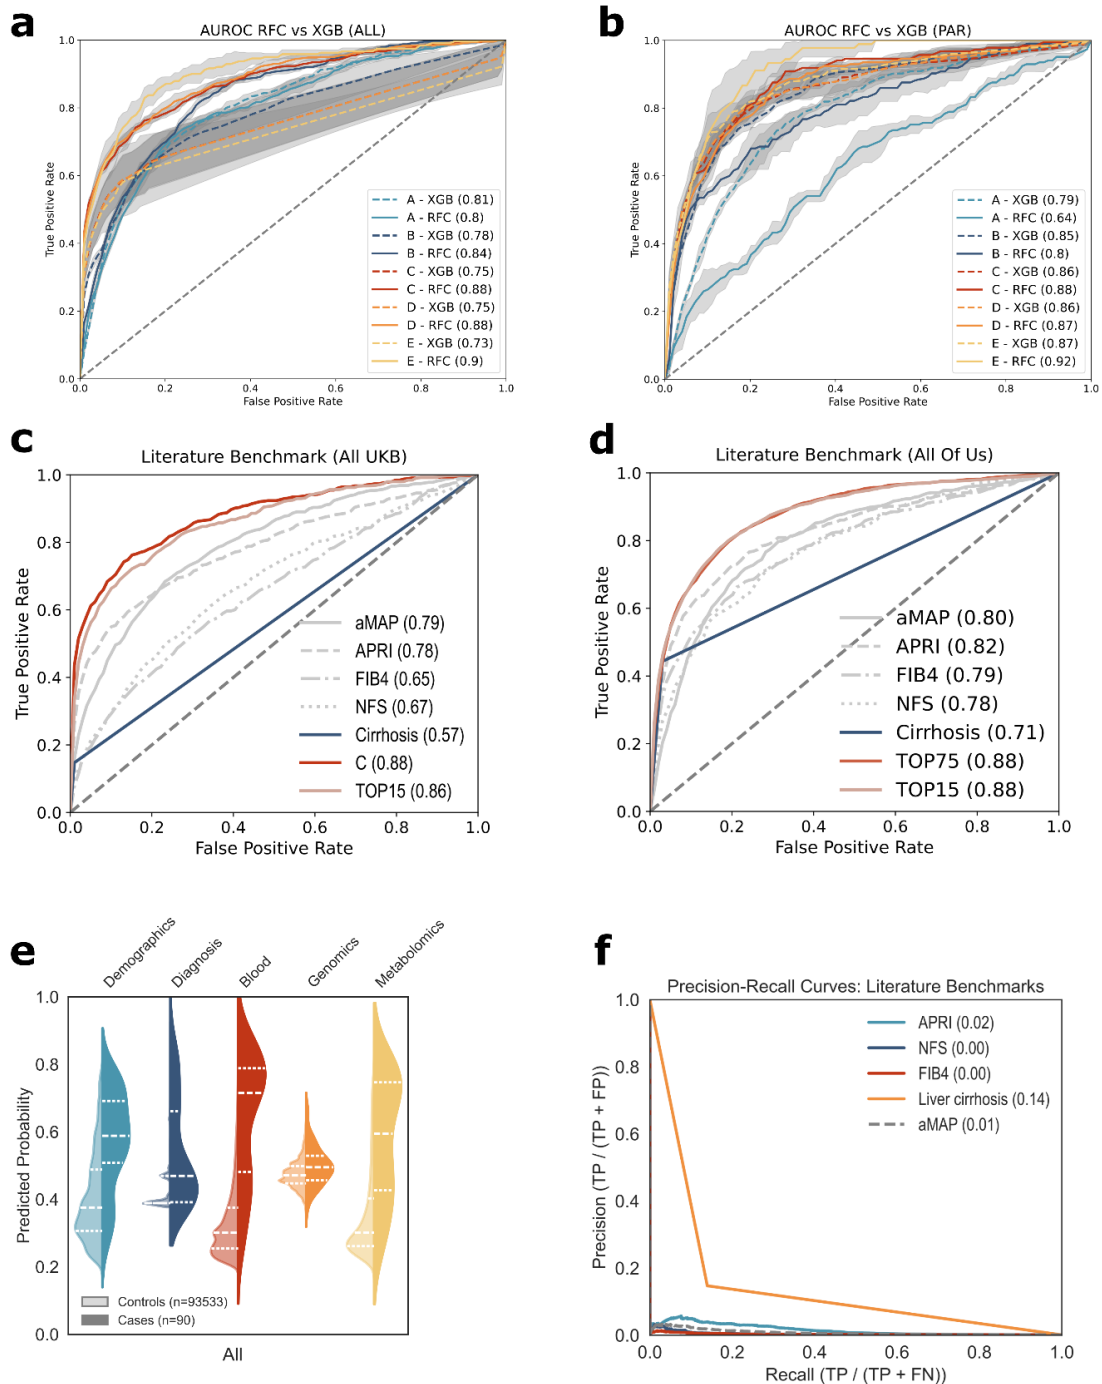

### Supplementary Fig. 3: Additional performance metrics

**a, b** Model performance on the test set of UKB as receiver operating characteristic (ROC) curves and corresponding area under the curve (AUC) for either all participants (a) or patients with pre-diagnosed liver disease (b). Each line represents the performance of one majority vote model from five-fold cross-validation  $\pm$  standard deviation of true positive rate, either for the random forest classifier (straight line) or extreme gradient boost (dotted line). **c** Performance of various established linear risk scores, cirrhosis as binary marker for all of UKB (England, Scotland, Wales), plotted against model performance of newly developed Model C and Model TOP15 for UKB test set performance (Scotland, Wales). **d** Risk scores as in c, but for AOU cohort. Models TOP75 and TOP15 applied to the whole AOU cohort. **e** Split violin distributions for prediction scores of separate models per modality for UKB cohort "All". **f** Precision-recall curves for literature benchmarks in UKB "All" cohort TP = True Positives, FP = False Positives, FN= False Negatives.

## Table of content for supplementary tables (see Supplementary\_Material.xlsx)

| Table                  | Description                                               | Cohort  |
|------------------------|-----------------------------------------------------------|---------|
| Supplementary Table 1  | ICD10 Codes used for Patients at risk definition          | UKB/AOU |
| Supplementary Table 2  | ICD10 Codes defined as single-entity feature              | UKB/AOU |
| Supplementary Table 3  | ICD10 Codes defined as grouped feature                    | UKB/AOU |
| Supplementary Table 4  | Assessment Features                                       | UKB     |
| Supplementary Table 5  | Blood Count Features                                      | UKB/AOU |
| Supplementary Table 6  | Metabolomics Features                                     | UKB     |
| Supplementary Table 7  | Single Nucleotide Polymorphisms Data                      | UKB     |
| Supplementary Table 8  | Mapping for self-reported diagnosis codes                 | UKB/AOU |
| Supplementary Table 9  | At-risk subsets and respective HCC/control cohort sizes   | UKB     |
| Supplementary Table 10 | Center splits                                             | UKB     |
| Supplementary Table 11 | HCC cases per center                                      | UKB     |
| Supplementary Table 12 | Mappings UKB_AOU MinMax Median Mean and Conversion        | UKB/AOU |
| Supplementary Table 13 | Table ICD                                                 | UKB     |
| Supplementary Table 14 | Table ICD                                                 | AOU     |
| Supplementary Table 15 | Table Blood Count/Biochemistry stratified for HCC and SEX | UKB     |
| Supplementary Table 16 | Table Blood Count/Biochemistry stratified for HCC and SEX | AOU     |
| Supplementary Table 17 | Metabolomics Stratified for HCC                           | UKB     |
| Supplementary Table 18 | Model Performances threshold-independent (AUROCs, AUPRCs) | UKB     |

|                        |                                                           |         |
|------------------------|-----------------------------------------------------------|---------|
| Supplementary Table 19 | Model performances threshold-dependent                    | UKB     |
| Supplementary Table 20 | Model Performances threshold-independent (AUROCs, AUPRCs) | AOU     |
| Supplementary Table 21 | Model performances threshold-dependent                    | AOU     |
| Supplementary Table 22 | Prediction Value Comparison                               | UKB/AOU |
| Supplementary Table 23 | Delong Tests                                              | UKB     |
| Supplementary Table 24 | Delong Tests                                              | AOU     |
| Supplementary Table 25 | Feature Importances Model A-E + TOP75-TOP15 UKB           | UKB     |

---
